# Supplementary material
Source: PubMed Central journal article supplement (PMC8014967)
Supplement: NIHMS1678505-supplement-Supporting_Info.pdf [file NIHMS1678505-supplement-Supporting_Info.pdf]

1                   **Occurrence and Mass Loading of Synthetic Opioids, Synthetic**  
2                   **Cathinones, and Synthetic Cannabinoids in Wastewater Treatment**  
3                   **Plants in Four U.S. Communities**

4 Catherine E. O'Rourke and Bikram Subedi\*

5 Department of Chemistry, Murray State University, 1201 Jesse D. Jones Hall, Murray, KY  
6 42071-3300, USA

7  
8 \*Corresponding author: B. Subedi  
9 Department of Chemistry, Murray State University  
10 1201 Jesse D. Jones Hall, Murray, KY 42071  
11 Tel: 1-270-809-6542  
12 Fax: 1-270-809-6474  
13 E-mail: bsubedi@murraystate.edu  
14  
15  
16  
17

18 **Table of Contents**

19  
20       1. Table S1. HPLC mobile phase compositions and programming for sample analysis (Flow  
21       rate = 0.300 mL/min) .....Page S2  
22       2. Table S2. Optimized MS/MS transitions and collision energies for all target drugs and  
23       their corresponding internal standards ..... Page S3-S13  
24       3. Figure S1. Schematic diagram showing the chromatographic separation of select drugs in  
25       a drug-spiked wastewater extract. All other target drug's chromatograms are presented in  
26       Figure 1 ..... Page S14-S15  
27       4. Optimization of Extraction Efficiency ..... Page S16-S17  
28       5. Prevalence of Gabapentin ..... Page S18  
29       6. References ..... Page S19  
30  
31  
32  
33  
34  
35  
36  
37  
38  
39  
40  
41  
42  
43  
44  
45

46  
47  
48  
49  
50  
51  
52  
53  
54

**Table S1.** HPLC mobile phase compositions and programming for sample analysis (Flow rate = 0.300 mL/min)

| <b>Time</b> | <b>0.1% Formic acid (aq.) (%)</b> | <b>Methanol (%)</b> |
|-------------|-----------------------------------|---------------------|
| 0.00        | 95.0                              | 5.0                 |
| 2.00        | 95.0                              | 5.0                 |
| 3.00        | 90.0                              | 10.0                |
| 5.50        | 70.0                              | 30.0                |
| 6.00        | 60.0                              | 40.0                |
| 7.50        | 50.0                              | 50.0                |
| 9.00        | 50.0                              | 50.0                |
| 9.30        | 48.0                              | 52.0                |
| 10.00       | 48.0                              | 52.0                |
| 10.30       | 45.0                              | 55.0                |
| 11.50       | 45.0                              | 55.0                |
| 12.00       | 40.0                              | 60.0                |
| 12.50       | 40.0                              | 60.0                |
| 13.00       | 35.0                              | 65.0                |
| 16.00       | 20.0                              | 80.0                |
| 18.00       | 20.0                              | 80.0                |
| 23.00       | 10.0                              | 90.0                |
| 25.00       | 5.0                               | 95.0                |
| 26.00       | 95.0                              | 5.0                 |

55

**Table S2.** Optimized MS/MS transitions and collision energies for all target drugs and their corresponding internal standards.

| Analytes                          | MS/MS Transitions | Collision Energy | Internal Standards | MS/MS Transitions | Collision Energy | Chemical Structures                                                                   |
|-----------------------------------|-------------------|------------------|--------------------|-------------------|------------------|---------------------------------------------------------------------------------------|
| <b><i>Synthetic Fentanyls</i></b> |                   |                  |                    |                   |                  |                                                                                       |
| Carfentanil                       | 395.1>335,105     | 15,50            | CAF-D <sub>5</sub> | 400.2>340.2,246   | 16               | 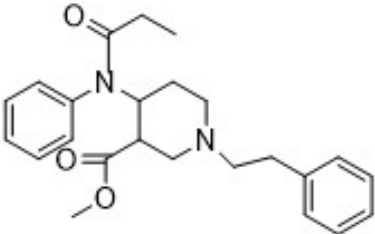   |
| Furanyl Fentanyl                  | 375.2>188.1,105   | 26               | FUF-D <sub>5</sub> | 380.2>188,105     | 20               |    |
| Valeryl Fentanyl                  | 365.2>188.1,105   | 24               | VAF-D <sub>5</sub> | 370.2>188.1,105   | 25               |   |
| Butyryl Fentanyl                  | 351.2>188.1,105   | 25               | BUF-D <sub>5</sub> | 356.2>188.1,105   | 22               |  |

|                           |                 |    |                      |                 |    |                                                                                       |
|---------------------------|-----------------|----|----------------------|-----------------|----|---------------------------------------------------------------------------------------|
| Acetyl Fentanyl           | 323.2>188.1,105 | 22 | ACF-13C <sub>6</sub> | 329.2>188.1,105 | 20 | 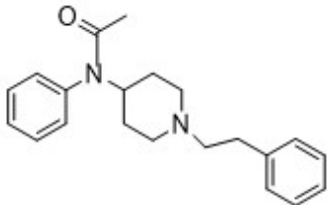   |
| Cyclopropyl Fentanyl      | 349.2>188.1,105 | 26 | CPF-D <sub>5</sub>   | 354.2>188.1,105 | 25 |    |
| Benzyl Fentanyl           | 323.2>174.1,91  | 22 |                      |                 |    |    |
| 3'-Methyl Fentanyl        | 351.2>202.1,119 | 24 |                      |                 |    |   |
| 4'-Methyl Acetyl Fentanyl | 337.2>202.1,119 | 22 | MAF-D <sub>5</sub>   | 342.2>202.1,119 | 24 |  |

|                             |                   |    |                     |                 |    |                                                                                       |
|-----------------------------|-------------------|----|---------------------|-----------------|----|---------------------------------------------------------------------------------------|
| 4-Fluro-Isobutyryl Fentanyl | 369.2>188.1,105   | 26 | FIBF-D <sub>7</sub> | 376.2>188.1,105 | 26 | 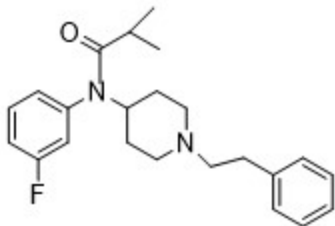   |
| para-Fluorobutyryl Fentanyl | 369.2>188,104.9   | 26 |                     |                 |    |    |
| Methoxyacetyl Fentanyl      | 353.2>188.1,104.9 | 22 | MOAF-D <sub>5</sub> | 358.2>188.1,105 | 22 |    |
| 4-ANPP                      | 281.1>188.1,105   | 14 | ANPP-D <sub>5</sub> | 286.2>188,105.1 | 15 |   |
| U-48800                     | 343>298,217.8     | 15 | U488-D <sub>3</sub> | 346.1>298,217.9 | 15 |  |

---

|         |                 |    |                     |               |    |
|---------|-----------------|----|---------------------|---------------|----|
| U-47700 | 329.1>284,203.9 | 18 | U477-D <sub>3</sub> | 332.1>287,176 | 15 |
|---------|-----------------|----|---------------------|---------------|----|

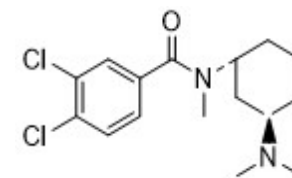

**Synthetic Cannabinoids**

|                    |               |    |
|--------------------|---------------|----|
| 5-Fluoro MDMB-PICA | 377.1>232,144 | 10 |
|--------------------|---------------|----|

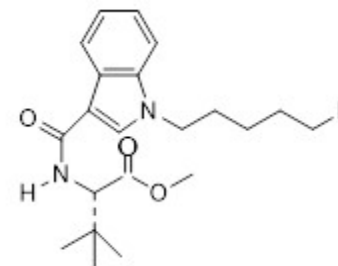

|              |               |       |                     |                   |   |
|--------------|---------------|-------|---------------------|-------------------|---|
| MAB-CHMINACA | 371.1>354,326 | 13,50 | MABC-D <sub>4</sub> | 375.2>358.2,330.1 | 7 |
|--------------|---------------|-------|---------------------|-------------------|---|

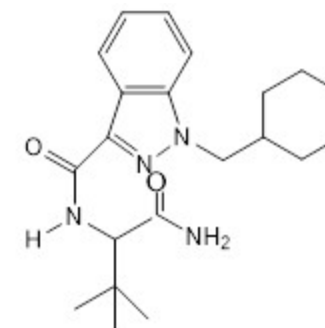

|              |                   |    |
|--------------|-------------------|----|
| MMB-FUBINACA | 384.1>324.1,252.9 | 11 |
|--------------|-------------------|----|

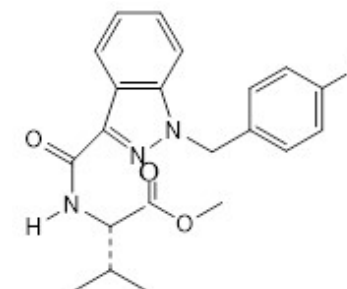

---

5-Fluoro EDMB-PINACA      392.1>318.2,346.1      9

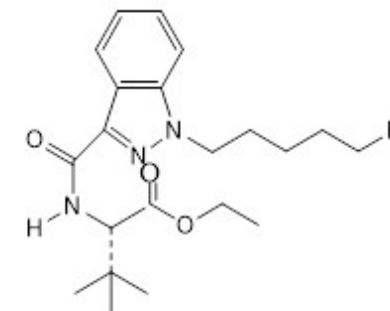

(R)-5-Fluoro ADB      378.2>318.1,233      16

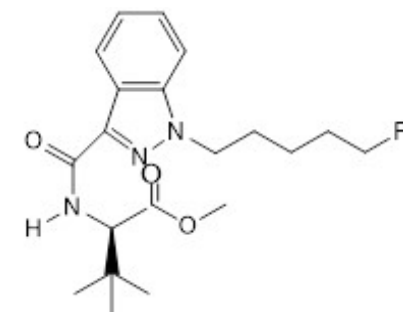

AB-FUBINACA      369.1>352,324.1      4      ABF-D<sub>4</sub>      373.1>328.1,356.1      7

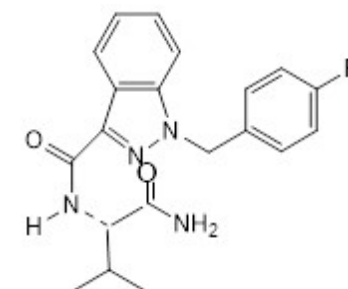

---

MMB-CHMICA 371.1>240,143.9 14

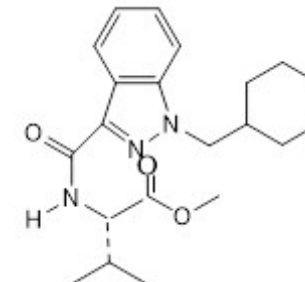

AB-CHMINACA 357.1>312.1,241 14

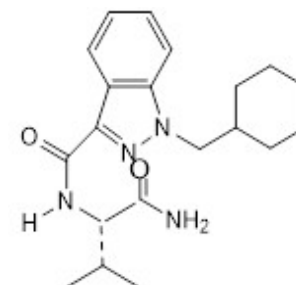

ADB-FUBINACA 383.1>338.1,253 15

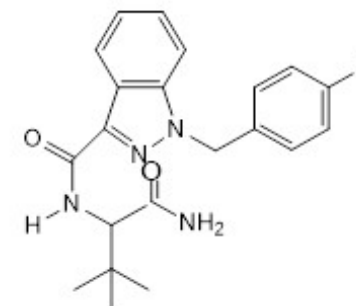



|                                    |                   |      |                    |                   |    |                                                                                       |
|------------------------------------|-------------------|------|--------------------|-------------------|----|---------------------------------------------------------------------------------------|
| 5-Fluoro AMB                       | 364.1>233,304.1   | 22   |                    |                   |    | 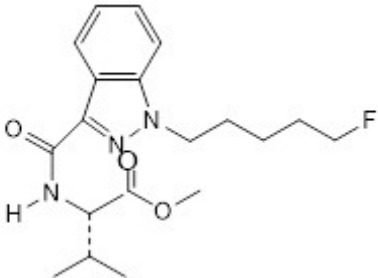   |
| NM2201                             | 376.1>232,143.9   | 5,43 |                    |                   |    |    |
| <b><i>Synthetic Cathinones</i></b> |                   |      |                    |                   |    |                                                                                       |
| Methcathinone                      | 164.1>146.1,131.1 | 12   | MC-D <sub>3</sub>  | 167.1>149.1,130.9 | 10 |   |
| Ethylone                           | 222.1>174.1,203.9 | 16   | ETO-D <sub>5</sub> | 227.1>179.1,209.1 | 15 |  |

|                                    |                   |    |                     |                   |    |                                                                                       |
|------------------------------------|-------------------|----|---------------------|-------------------|----|---------------------------------------------------------------------------------------|
| 4-MMC/ Mephedrone                  | 178.1>160.1,145.1 | 11 | MMC-D <sub>3</sub>  | 181.1>163.1,148   | 10 | 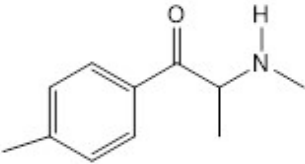   |
| 4-Methyl Pentedrone                | 206.1>188,175     | 5  |                     |                   |    |    |
| N-Ethylpentylone                   | 250.1>232.1,202.1 | 12 | NEP-D <sub>5</sub>  | 255.1>207.1,237.1 | 20 |    |
| $\alpha$ -Pyrrolidinopropiophenone | 204.1>105.1,98.1  | 28 |                     |                   |    |   |
| 3,4-Methylenedioxypropylone        | 276.1>126.1,135   | 27 | MDPV-D <sub>8</sub> | 284.2>134.2,175   | 30 |  |

|                                                    |                   |    |                    |                 |    |                                                                                       |
|----------------------------------------------------|-------------------|----|--------------------|-----------------|----|---------------------------------------------------------------------------------------|
| $\alpha$ -Ethylaminohexanophenone                  | 220.1>202.1,146   | 10 |                    |                 |    | 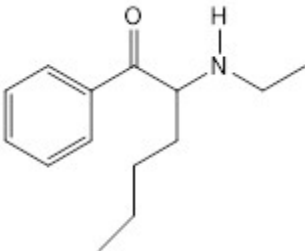   |
| 2-Methyl-4'-(methylthio)-2-Morpholinopropiophenone | 280.1>165,88      | 18 |                    |                 |    |    |
| 4-Chloro- $\alpha$ -PVP                            | 266.1>125,195     | 23 |                    |                 |    |    |
| <b><u>Piperazines</u></b>                          |                   |    |                    |                 |    |                                                                                       |
| 1-(3-Chlorophenyl) Piperazine (mCPP)               | 197.1>153.9,119.1 | 21 | CPP-D <sub>8</sub> | 205.1>158,122.9 | 23 |  |

|                               |                   |    |          |                 |    |                                                                                       |
|-------------------------------|-------------------|----|----------|-----------------|----|---------------------------------------------------------------------------------------|
| MT-45                         | 349.2>181.1,169.1 | 22 | MT45-D11 | 360.3>181,166   | 22 | 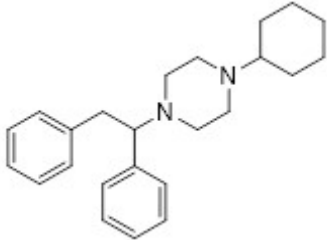   |
| <b><u>Indole</u></b>          |                   |    |          |                 |    |                                                                                       |
| 5-IT                          | 175.1>158,130     | 10 |          |                 |    |    |
| <b><u>Amphetamine</u></b>     |                   |    |          |                 |    |                                                                                       |
| 4-methylamphetamine           | 150.1>105,133.1   | 17 |          |                 |    |    |
| <b><u>Anticonvulsants</u></b> |                   |    |          |                 |    |                                                                                       |
| Gabapentin                    | 172.1>154.1,137.1 | 13 | GBP-D10  | 182.2>164,147.2 | 12 |   |
| Clonazepam                    | 315.9>269.9,241   | 27 | CZP-D4   | 320>274,217.8   | 24 |  |

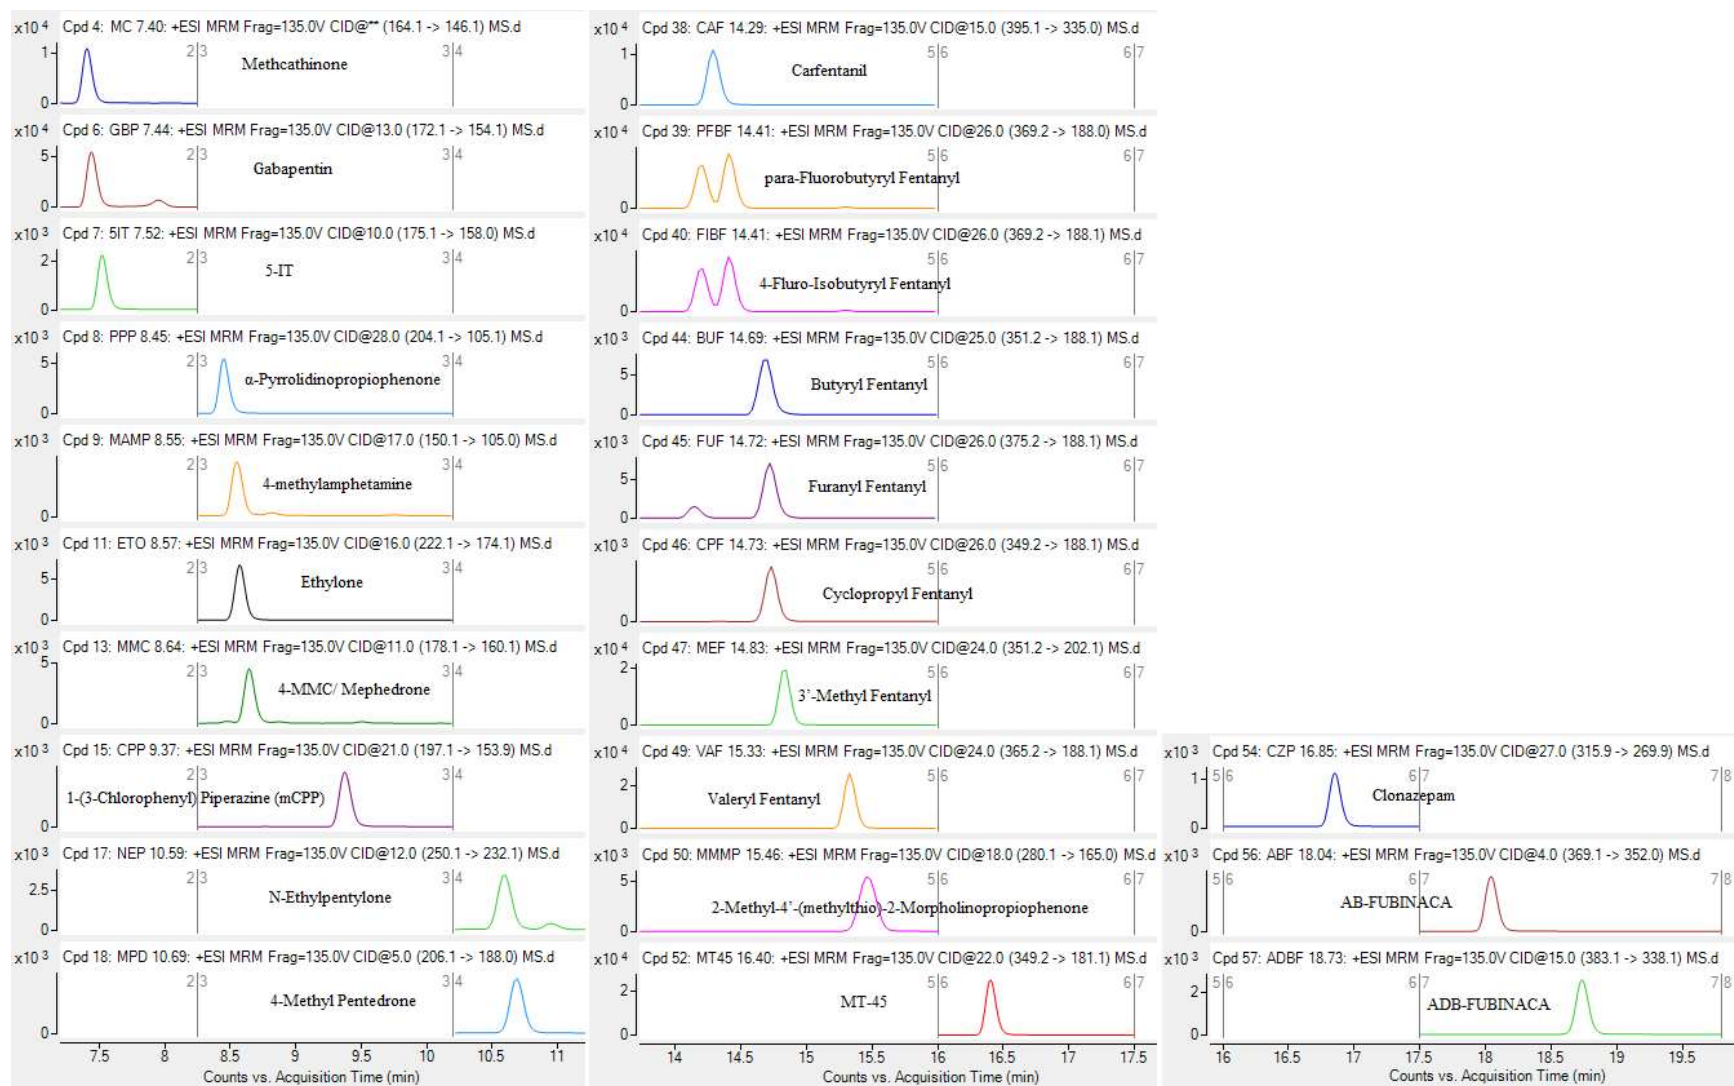

**Figure S1.** Schematic diagram showing the chromatographic separation of select drugs in a drug-spiked (50 or 100 ng) wastewater extract. All other target drug's chromatograms are presented in Figure 1.

56           **Optimization of Extraction Efficiency.** For the simultaneous extraction of cannabinoids,  
57 cathinones, and synthetic opioids, the three most frequently used extraction cartridges (HLB,  
58 MCX, and WCX) were examined for their optimum extraction efficiency. It is important to note  
59 that the recoveries reported herein are absolute recoveries. In real sample analysis, deuterated  
60 analogs (internal standards) were spiked prior to extraction that corrected the loss of target NPSs.  
61 At 2 or 4 ppb spiking level, the spiking recoveries of target NPSs using HLB and HLB-A ranged  
62 from  $50.6 \pm 1.5$  % (MAMP) to  $115 \pm 3.4$  % (MABC) and  $50.6 \pm 4.0$  % (MAMP) to  $132 \pm 2.5$  %  
63 (CPF), respectively (Figure 2A). Similarly, spiking recoveries of target NPSs using MCX and  
64 WCX ranged from  $51.8 \pm 0.34$  % (MAMP) to  $132 \pm 3.2$  % (MABC) and  $48.0 \pm 1.5$  % (MAMP)  
65 to  $128 \pm 0.90$  % (CPF), respectively. However, the spiking recoveries of some NPSs including  
66 BUF, FUF, and MEF were >150% with all cartridges whereas the spiking recoveries of U477  
67 could not be determined using HLB and HLB-A cartridges.

68           At 50 or 100 ppb spiking level, spiking recoveries of target NPSs using HLB and HLB-A  
69 ranged from  $39.9 \pm 1.9$  % (PVP) to  $174.0 \pm 12.1$  % (MAMP) and  $50.3 \pm 3.98$  % (PPP) to  $128.7 \pm$   
70  $3.0$  % (ADBF), respectively (Figure 2B). However, the average percentage recoveries were  
71 exceptionally high (>200%) for 5-IT and MAMP while exceptionally low (<3%) for NM2201 with  
72 HLB and/or HLB-A. Similarly, the spiking recoveries of target NPSs using MCX and WCX at 50  
73 or 100 ppb spiking level ranged from  $54.2 \pm 5.3$  % (NM2201) to  $127.2 \pm 5.8$  % (FUF), and  $41.3 \pm$   
74  $2.4$  % (5-IT) to  $133.7 \pm 2.5$  % (BUF), respectively. Bade et al.<sup>21</sup> found MCX-extraction more  
75 efficient than HLB-extraction for cathinones whereas Fontanals et al.<sup>1</sup> preferred WCX over MCX  
76 for cathinones. To the authors' knowledge, there was no report of the optimized extraction of  
77 synthetic fentanyl from wastewater. Salguero et al.<sup>2</sup> used both HLB and MCX cartridges to cover  
78 the wide range of physio-chemical properties of NPSs including cathinones and cannabinoids.

79 However, the simultaneous extraction of diverse NPSs using a unique SPE cartridge is always a  
80 method of choice owing to the cost, time, and labor associated with the extraction through multiple  
81 cartridges. As the triplicate spiking recoveries of target NPSs using MCX extraction cartridge found  
82 an optimum; MCX was considered for the extraction of NPSs from the collected wastewater  
83 samples to determine their prevalence in communities. Overall, the absolute spiking recoveries of  
84 target NPS were satisfactory not only at the mid-point calibration-level but also at the  
85 environmentally relevant concentration level.

86

87 **Prevalence of Gabapentin.** Gabapentin is a gamma-aminobutyric acid (GABA)-mediated potential  
88 drug of abuse. The rate of on- and off-label prescriptions of gabapentin as an alternative to opioids  
89 for pain management has been increased recently due to the associated lower cost and its  
90 classification as a non-controlled substance in the U.S.<sup>3</sup> The co-administration of gabapentin and  
91 opioids causes the drug-induced respiratory depression and increase the opioid-related deaths.<sup>4</sup> The  
92 gabapentin overdose cases are alarming along with opioid epidemic in the Midwest and Southeast  
93 regions including Illinois and Kentucky. Kentucky designated gabapentin as a schedule V drug while  
94 Illinois initiated prescription monitoring program to track gabapentin prescriptions. In this study,  
95 Gabapentin was quantified in all wastewater samples and the average concentrations in communities  
96 C1, C2, C3, and C4 were  $131 \pm 7.6 \mu\text{g/L}$ ,  $58.6 \pm 5.1 \mu\text{g/L}$ ,  $25.5 \pm 1.2 \mu\text{g/L}$ , and  $12.1 \pm 1.4 \mu\text{g/L}$ ,  
97 respectively. The average concentration of gabapentin in wastewater influent from five WWTP in  
98 Germany was ranged from 3.67 to 11.88  $\mu\text{g/L}$ .<sup>5</sup> In the U.S., gabapentin was not only quantified in  
99 wastewater (up to 3.3  $\mu\text{g/L}$ ) in Minnesota<sup>6</sup> but also detected in wastewater infiltrated surface water  
100 collected from four national parks in the Midwest U.S.A. including Mississippi National River and  
101 Recreation Area (up to 1.08  $\mu\text{g/L}$ ) and Indiana Dunes National Lakeshore (up to 2.79  $\mu\text{g/L}$ ),

102 respectively.<sup>7</sup> The prevalence of gabapentin in target four rural communities in Illinois was also  
103 determined based on the residual gabapentin in wastewater, 90% excretion rate,<sup>8</sup> 10% loss (in-sewer  
104 degradation, the degradation in wastewater during sample collection, and the degradation prior  
105 sample extraction),<sup>9</sup> and a single daily dose of 1050 mg by an individual in the WWTP catchment.  
106 The estimated daily doses of gabapentin in C1, C2, C3, and C4 communities were  $40.6 \pm 1.1$ ,  $21.0$   
107  $\pm 2.2$ ,  $18.5 \pm 0.58$ , and  $8.32 \pm 0.87$  per 1000 people, respectively.

108

## 109 References

- 110 1. Fontanals, N.; Marcé, R. M.; Borrull, F. Solid-phase extraction followed by liquid  
111 chromatography-high resolution mass spectrometry to determine synthetic cathinones  
112 indifferent types of environmental water samples. *J. Chromatogr. A* **2017**, *1524*, 66–73.
- 113 2. Salgueiro-González, N.; Castiglioni, S.; Gracia-Lor, E.; Bijlsma, L.; Celma, A.; Bagnati, R.;  
114 Hernández, F.; Zuccato, E. Flexible high resolution-mass spectrometry approach for screening  
115 new psychoactive substances in urban wastewater. *Sci. Total Environ.* **2019**, *689*, 679–690.
- 116 3. Evoy, K. E.; Covvey, J. R.; Peckham, A. M.; Ochs, L.; Hultgren, K. E. Reports of gabapentin  
117 and pregabalin abuse, misuse, dependence, or overdose: An analysis of the food and drug  
118 administration adverse events reporting system (FAERS). *Res. Social Admin. Pharm.* **2019**, *15*,  
119 953-958.
- 120 4. Gomes, T.; Juurlink, D. N.; Antoniou, T.; Mamdani, M. M.; Paterson, J. M.; van den Brink, W.  
121 Gabapentin, opioids, and the risk of opioid related death: A population-based nested case –  
122 control study. *PLoS Med.* **2017**, *14*, e1002396.
- 123 5. Oertel, R.; Baldauf, J.; Rossmann, J. Development and validation of a hydrophilic interaction  
124 liquid chromatography-tandem mass spectrometry method for the quantification of the  
125 antidiabetic drug metformin and six others pharmaceuticals in wastewater. *J. Chromatogr. A*  
126 **2018**, *1556*, 73-80.
- 127 6. Writer, J. H.; Ferrer, E.; Barber, L. B.; Thurman, E. M. Widespread occurrence of neuro-active  
128 pharmaceuticals and metabolites in 24 Minnesota rivers and wastewaters. *Sci. Total Environ.*  
129 **2013**, *461-462*, 519–527.
- 130 7. Elliott, S. M.; VanderMeulen, D. D. A regional assessment of chemicals of concern in surface  
131 waters of four Midwestern United States national parks. *Sci. Total Environ.* **2017**, *579*, 1726–  
132 1735.
- 133 8. Baselt, R.C. Disposition of Toxic Drugs and Chemicals in Man. Eleventh Edition, **2017**.
- 134 9. O’Brian, J. W.; Banks, A. P. W.; Novic, A. J.; Mueller, J. F.; Jiang, G.; Ort, C.; Egelsham, G.;  
135 Yuan, Z.; Thai, P. K. Impact of in-Sewer Degradation of Pharmaceutical and Personal Care  
136 Products (PPCPs) Population Markers on a Population Model. *Environ. Sci. Technol.* **2017**, *51*,  
137 3816-3823.

138
